# Supplementary material for: Zinc catalyzed chemoselective hydrofunctionalization of cyanamides
Source: Royal Society of Chemistry journal article supplement (doi:10.1039/d4cc03972f), 2024-01-01
Supplement: d4cc03972f1.pdf [file d4cc03972f1.pdf]

## **Data Availability Statements**

The data supporting this article have been included as part of the ESI.
